# Supplementary material for: Comparison of tumor assessments using RECIST 1.1 and irRECIST, and association with overall survival
Source: HighWire-hosted journal article supplement (doi:10.1136/jitc-2021-003302), 2022-02-01
Supplement: jitc-2021-003302supp001_data_supplement.pdf [file jitc-2021-003302supp001_data_supplement.pdf]

## Supplement

### Supplementary Methods

- The rank correlations between OS and PFS by RECIST 1.1, as well as OS and irPFS by irRECIST, were derived using a bivariate semiparametric model that takes into account censoring of the variables<sup>1</sup>
- First, censored observations in PFS, irPFS, and OS were augmented using Gaussian copulas, and then the Spearman rank correlation coefficient for the imputed variables was calculated using an iterative multiple imputation method provided by Schemper et al<sup>1</sup>
- For comparison, respective null Pearson correlations were calculated under the assumption of independent exponential distributions,<sup>2</sup> which can be derived as the fraction between median PFS and median OS:

$$\circ \rho_0(PFS, OS) = \frac{\text{median}(PFS)}{\text{median}(OS)}$$

- Of note, the Pearson correlation is generally lower than the Spearman rank correlation

### Supplementary References

1. Schemper M, Kaider A, Wakounig S, et al. Estimating the correlation of bivariate failure times under censoring. *Stat Med* 2013;32:4781-4790.
2. Fleischer F, Gaschler-Markefski B, Bluhmki E. A statistical model for the dependence between progression-free survival and overall survival. *Stat Med* 2009;28:2669-2686.
3. Eisenhauer EA, Therasse P, Bogaerts J, et al. New response evaluation criteria in solid tumours: revised RECIST guideline (version 1.1). *Eur J Cancer* 2009;45:228-247.
4. Nishino M, et al. *Clin Cancer Res* 2013;19:3936-3943.

**Supplementary Table 1.** Comparison of RECIST 1.1 and irRECIST

| RECIST 1.1 <sup>3</sup>                                                                                                                                                                                                                                                                                                                                                   | irRECIST*                                                                                                                                                                                                                                                                                                                                         |
|---------------------------------------------------------------------------------------------------------------------------------------------------------------------------------------------------------------------------------------------------------------------------------------------------------------------------------------------------------------------------|---------------------------------------------------------------------------------------------------------------------------------------------------------------------------------------------------------------------------------------------------------------------------------------------------------------------------------------------------|
| CR                                                                                                                                                                                                                                                                                                                                                                        | irCR                                                                                                                                                                                                                                                                                                                                              |
| <ul style="list-style-type: none"> <li>• Complete disappearance of all non-nodal lesions and return of nodal lesions to normal size without new lesions</li> <li>• Pathological lymph nodes (target or nontarget) must have reduction in short axis to &lt;10 mm</li> <li>• Confirmed by second scan <math>\geq 4</math> weeks after CR assessment<sup>†</sup></li> </ul> | <ul style="list-style-type: none"> <li>• Complete disappearance of non-nodal lesions and return of nodal lesions to normal size without new lesions</li> <li>• Measurable lymph nodes must have reduction in short axis to <math>\leq 10</math> mm</li> <li>• Confirmed by second scan <math>\geq 4</math> weeks after irCR assessment</li> </ul> |
| PR                                                                                                                                                                                                                                                                                                                                                                        | irPR                                                                                                                                                                                                                                                                                                                                              |
| <ul style="list-style-type: none"> <li>• Decrease in sum of longest diameters of target lesions by <math>\geq 30\%</math> (compared with baseline)</li> <li>• No marked increase in nontarget lesions or no new lesions</li> <li>• Confirmed by second scan <math>\geq 4</math> weeks after PR assessment<sup>†</sup></li> </ul>                                          | <ul style="list-style-type: none"> <li>• Decrease in sum of longest diameters of target and new measurable lesions by <math>\geq 30\%</math> (compared with baseline)</li> <li>• No marked increase in nontarget lesions</li> <li>• Confirmed by second scan <math>\geq 4</math> weeks after irPR assessment</li> </ul>                           |
| SD                                                                                                                                                                                                                                                                                                                                                                        | irSD                                                                                                                                                                                                                                                                                                                                              |
| <ul style="list-style-type: none"> <li>• Neither CR/PR nor PD</li> </ul>                                                                                                                                                                                                                                                                                                  | <ul style="list-style-type: none"> <li>• Neither irCR/irPR nor irPD</li> </ul>                                                                                                                                                                                                                                                                    |
| PD                                                                                                                                                                                                                                                                                                                                                                        | irPD                                                                                                                                                                                                                                                                                                                                              |

- Increase in the sum of longest diameters of target lesions by  $\geq 20\%$  relative to smallest sum on study (including baseline)
- Absolute increase in sum of longest diameters of  $\geq 5$  mm
- Unequivocal increase in nontarget lesions
- Appearance of  $\geq 1$  new lesion(s)
- Increase in the sum of longest diameters of target and new measurable lesions by  $\geq 20\%$  (compared with nadir)
- Absolute increase in sum of longest diameters of  $\geq 5$  mm
- Confirmed by second scan  $\geq 4$  weeks after irPD assessment; death, treatment discontinuation, initiation of follow-up treatment, or treatment reinitiation within 84 days after irPD assessment; or discontinuation of imaging

---

CR, complete response; irCR, immune-related CR; irPD, immune-related PD; irPR, immune-related PR; irRECIST, immune-related Response Evaluation Criteria in Solid Tumors; irSD, immune-related SD; PD, progressive disease; PR, partial response; SD, stable disease.

\* irRECIST criteria used in this analysis were defined according to the study protocols and were similar to the definition of irRECIST by Nishino M, et al <sup>4</sup>

† Required for confirmed CR/PR; frequency of tumor reevaluation is specified by the trial protocol.

**Supplementary Table 2.** Comparison of disease progression assessed by RECIST 1.1 and irRECIST

| RECIST 1.1 <sup>3</sup>                                                                                                                                                                                                                                                                                                                                                                             | irRECIST*                                                                                                                                                                                                                                                                                                                                                                                                                                                                                                                    |
|-----------------------------------------------------------------------------------------------------------------------------------------------------------------------------------------------------------------------------------------------------------------------------------------------------------------------------------------------------------------------------------------------------|------------------------------------------------------------------------------------------------------------------------------------------------------------------------------------------------------------------------------------------------------------------------------------------------------------------------------------------------------------------------------------------------------------------------------------------------------------------------------------------------------------------------------|
| PD                                                                                                                                                                                                                                                                                                                                                                                                  | irPD                                                                                                                                                                                                                                                                                                                                                                                                                                                                                                                         |
| <ul style="list-style-type: none"> <li>• Increase in the sum of longest diameters of target lesions by <math>\geq 20\%</math>, relative to smallest sum on study (including baseline)</li> <li>• Absolute increase in sum of longest diameters of <math>\geq 5</math> mm</li> <li>• Unequivocal increase in nontarget lesions</li> <li>• Appearance of <math>\geq 1</math> new lesion(s)</li> </ul> | <ul style="list-style-type: none"> <li>• Increase in the sum of longest diameters of target and new measurable lesions by <math>\geq 20\%</math> (compared with nadir)</li> <li>• Absolute increase in sum of longest diameters of <math>\geq 5</math> mm</li> <li>• Confirmed by second scan <math>\geq 4</math> weeks after irPD assessment; death, treatment discontinuation, initiation of follow-up treatment, or treatment reinitiation within 84 days after irPD assessment; or discontinuation of imaging</li> </ul> |

irRECIST; immune-related RECIST; irPD, immune-related PD; PD, progressive disease;

RECIST 1.1, Response Evaluation Criteria in Solid Tumors version 1.1

\* irRECIST criteria used in this analysis were defined according to the study protocols and were similar to the definition of irRECIST by Nishino M, et al.<sup>4</sup>

**Supplementary Table 3.** Tumor types in the concordant disease control, discordant, and concordant disease progression subgroups

| Patients, n (%)                         | ACC<br>(n=50) | CRC<br>(n=21) | GC/GEJC<br>(n=282) | MBC<br>(n=168) | MCC<br>(n=88) | Melanoma<br>(n=51) | Mesothelioma<br>(n=53) | NSCLC<br>(n=340) | OC<br>(n=228) | RCC<br>(n=82) | SCCHN<br>(n=153) | UC<br>(n=249) | Overall<br>(N=1765) |
|-----------------------------------------|---------------|---------------|--------------------|----------------|---------------|--------------------|------------------------|------------------|---------------|---------------|------------------|---------------|---------------------|
| Concordant disease control subgroup     | 24<br>(48.0)  | 9<br>(42.9)   | 99<br>(35.1)       | 47<br>(28.0)   | 42<br>(47.7)  | 27<br>(52.9)       | 31<br>(58.5)           | 191<br>(56.2)    | 109<br>(47.8) | 63<br>(76.8)  | 70<br>(45.8)     | 108<br>(43.4) | 820<br>(46.5)       |
| Discordant subgroup                     | 5<br>(10.0)   | 1<br>(4.8)    | 23<br>(8.2)        | 20<br>(11.9)   | 4<br>(4.5)    | 4<br>(7.8)         | 5<br>(9.4)             | 27<br>(7.9)      | 19<br>(8.3)   | 5<br>(6.1)    | 13<br>(8.5)      | 21<br>(8.4)   | 147<br>(8.3)        |
| Concordant disease progression subgroup | 21<br>(42.0)  | 11<br>(52.4)  | 160<br>(56.7)      | 101<br>(60.1)  | 42<br>(47.7)  | 20<br>(39.2)       | 17<br>(32.1)           | 122<br>(35.9)    | 100<br>(43.9) | 14<br>(17.1)  | 70<br>(45.8)     | 120<br>(48.2) | 789<br>(45.2)       |

ACC, adrenocortical carcinoma; CRC, colorectal cancer; GC/GEJC, gastric cancer/gastroesophageal junction cancer; MBC, metastatic breast cancer; MCC, Merkel cell carcinoma; NSCLC; non-small cell lung cancer; OC, ovarian cancer; RCC, renal cell carcinoma; SCCHN, squamous cell carcinoma of the head and neck; UC, urothelial carcinoma.

**Supplementary Table 4.** Treatment and imaging in the overall patient population and in the discordant and concordant disease progression subgroups

|                                       | Discordant subgroup<br>(n=147) | Concordant disease<br>progression<br>subgroup (n=798) | Overall (N=1765)   |
|---------------------------------------|--------------------------------|-------------------------------------------------------|--------------------|
| Median DOT (range), weeks             | 12.0<br>(2.0-97.9)             | 6.00<br>(2.00-124)                                    | 12.0<br>(2.00-173) |
| Treatment, n (%)                      |                                |                                                       |                    |
| Beyond PD                             |                                |                                                       |                    |
| Yes                                   | 106 (72.1)                     | 303 (38.0)                                            | 671 (38.0)         |
| No                                    | 41 (27.9)                      | 495 (62.0)                                            | 1094 (62.0)        |
| Beyond irPD                           |                                |                                                       |                    |
| Yes                                   | 32 (21.8)                      | 289 (36.2)                                            | 541 (30.7)         |
| No                                    | 115 (78.2)                     | 509 (63.8)                                            | 1224 (69.3)        |
| Imaging timepoints, n (%)             |                                |                                                       |                    |
| Beyond PD                             |                                |                                                       |                    |
| Yes                                   | 108 (73.5)                     | 400 (50.1)                                            | 826 (46.8)         |
| No                                    | 39 (26.5)                      | 199 (24.9)                                            | 417 (23.6)         |
| Missing                               | 0                              | 199 (24.9)                                            | 522 (29.6)         |
| Beyond irPD                           |                                |                                                       |                    |
| Yes                                   | 28 (19.0)                      | 247 (31.0)                                            | 471 (26.7)         |
| No                                    | 43 (29.3)                      | 295 (37.0)                                            | 545 (30.9)         |
| Missing                               | 76 (51.7)                      | 256 (32.1)                                            | 749 (42.4)         |
| Tumor shrinkage by $\geq 5\%$ , n (%) |                                |                                                       |                    |
| After PD                              |                                |                                                       |                    |

---

|            |            |            |             |
|------------|------------|------------|-------------|
| Yes        | 54 (36.7)  | 206 (25.8) | 400 (22.7)  |
| No         | 93 (63.3)  | 592 (74.2) | 1365 (77.3) |
| After irPD |            |            |             |
| Yes        | 22 (15.0)  | 231 (28.9) | 398 (22.5)  |
| No         | 125 (85.0) | 567 (71.1) | 1367 (77.5) |

---

DOT, duration of treatment; irPD, immune-related PD; PD, progressive disease.

**Supplementary Figure 1.** PD assessed by RECIST 1.1 in target, nontarget, and new lesions in the overall population and in the discordant and concordant disease progression subgroups

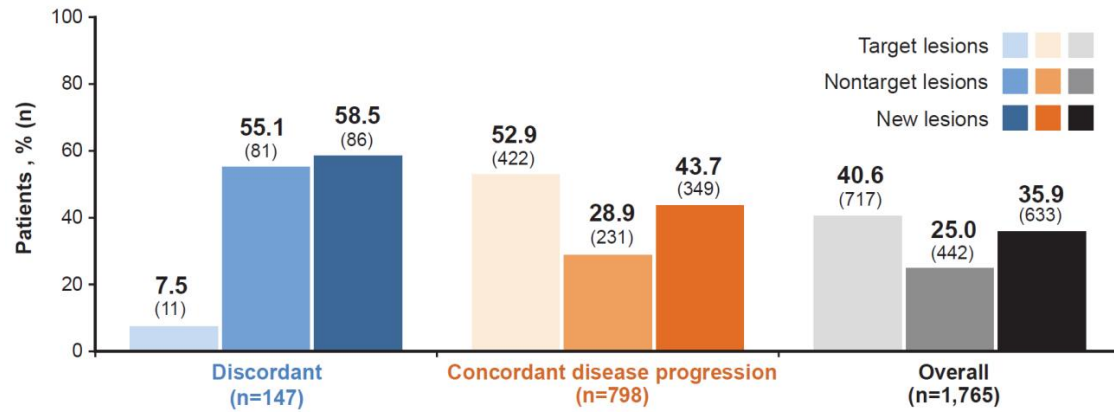

PD, progressive disease; RECIST 1.1, Response Evaluation Criteria in Solid Tumors version 1.1.
